# Supplementary material for: Water-soluble photocatalysts based on porphyrin-carbon dot conjugates produce H2 under visible light irradiation
Source: Royal Society of Chemistry journal article supplement (doi:10.1039/d4dt02101k), 2024-11-04
Supplement: d4dt02101k1.pdf [file d4dt02101k1.pdf]

## Electronic Supplementary Information

### Stable water soluble photocatalysts based on porphyrin-carbon dots conjugates produce H<sub>2</sub> under visible light irradiation

Katerina Achilleos,<sup>†a</sup> Anna Katsari,<sup>†a</sup> Emmanouil Nikoloudakis,<sup>\*b</sup> Foteini Chatzipetri,<sup>a</sup>  
Dimitris Tsikritzis,<sup>c</sup> Kalliopi Ladomenou,<sup>\*d</sup> Georgios Charalambidis,<sup>\*e</sup> Emmanuel  
Stratakis,<sup>b,f</sup> and Athanassios G. Coutsolelos<sup>\*a,b</sup>

<sup>a</sup> Laboratory of Bioinorganic Chemistry, Chemistry Department, University of Crete,  
70013 Heraklion, Crete, Greece.

<sup>b</sup> Foundation for Research and Technology (FORTH), Institute of Electronic Structure  
and Laser (IESL), 70013, Heraklion, Greece.

<sup>c</sup> Department of Electrical & Computer Engineering, Hellenic Mediterranean  
University (HMU), Heraklion, Crete 71410, Greece.

<sup>d</sup> Hephaestus Laboratory, Department of Chemistry, School of Science, Democritus  
University of Thrace, Kavala, Greece.

<sup>e</sup> Theoretical and Physical Chemistry Institute, National Hellenic Research Foundation,  
48 Vassileos Constantinou Ave., 11635, Athens, Greece.

<sup>f</sup> Qingdao Innovation and Development Center, Harbin Engineering University,  
Qingdao 266000 Shandong, P. R. China.

<sup>†</sup> These two authors contributed equally to this work.

#### Corresponding Authors

E-mail: [enikoloudakis@iesl.forth.gr](mailto:enikoloudakis@iesl.forth.gr) (E.N.), [kladomenou@chem.duth.gr](mailto:kladomenou@chem.duth.gr) (K.L.),  
[gcharal@eie.gr](mailto:gcharal@eie.gr) (G.C.), [acoutsol@uoc.gr](mailto:acoutsol@uoc.gr) (A.G.C)

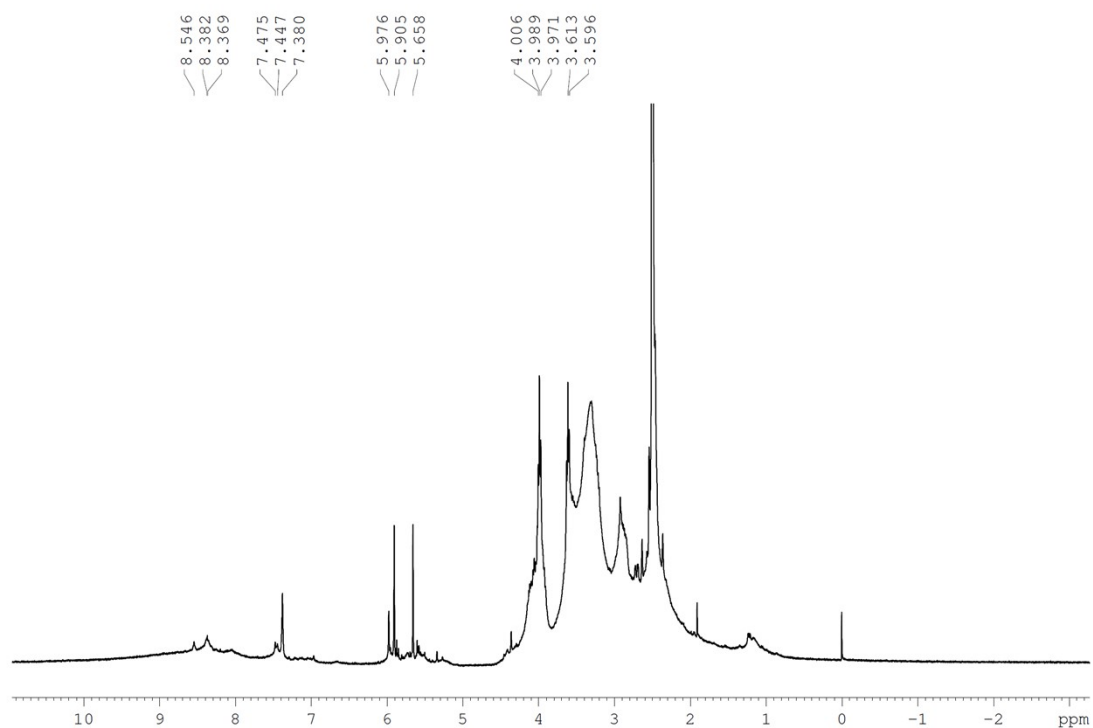

Figure S1.  $^1\text{H}$  NMR spectrum of NCDots in  $d_6$ -DMSO.

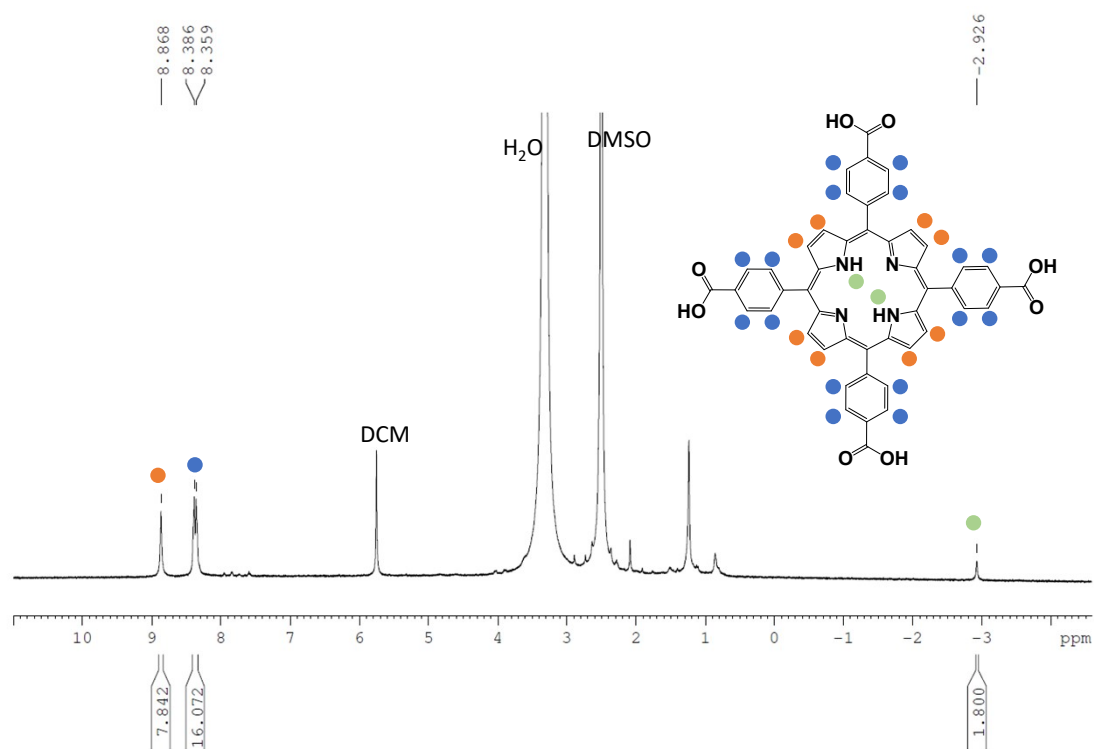

Figure S2.  $^1\text{H}$  NMR spectrum of compound TCPP in  $d_6$ -DMSO.

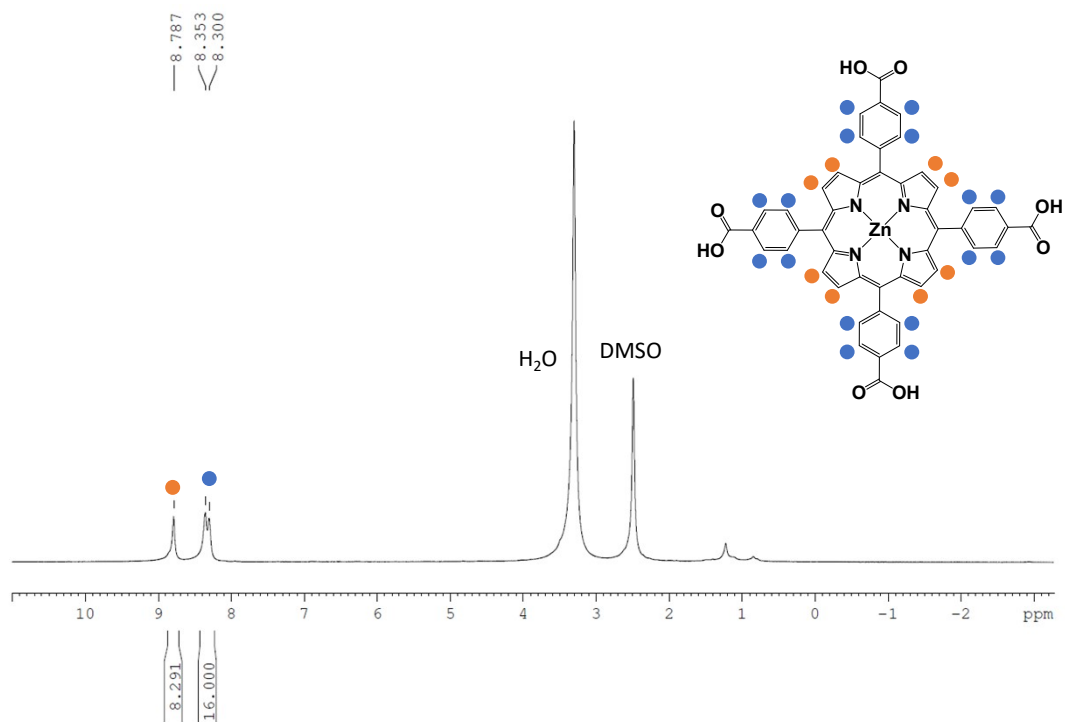

**Figure S3.**  $^1\text{H}$  NMR spectrum of compound **ZnTCPP** in  $\text{d}_6\text{-DMSO}$ .

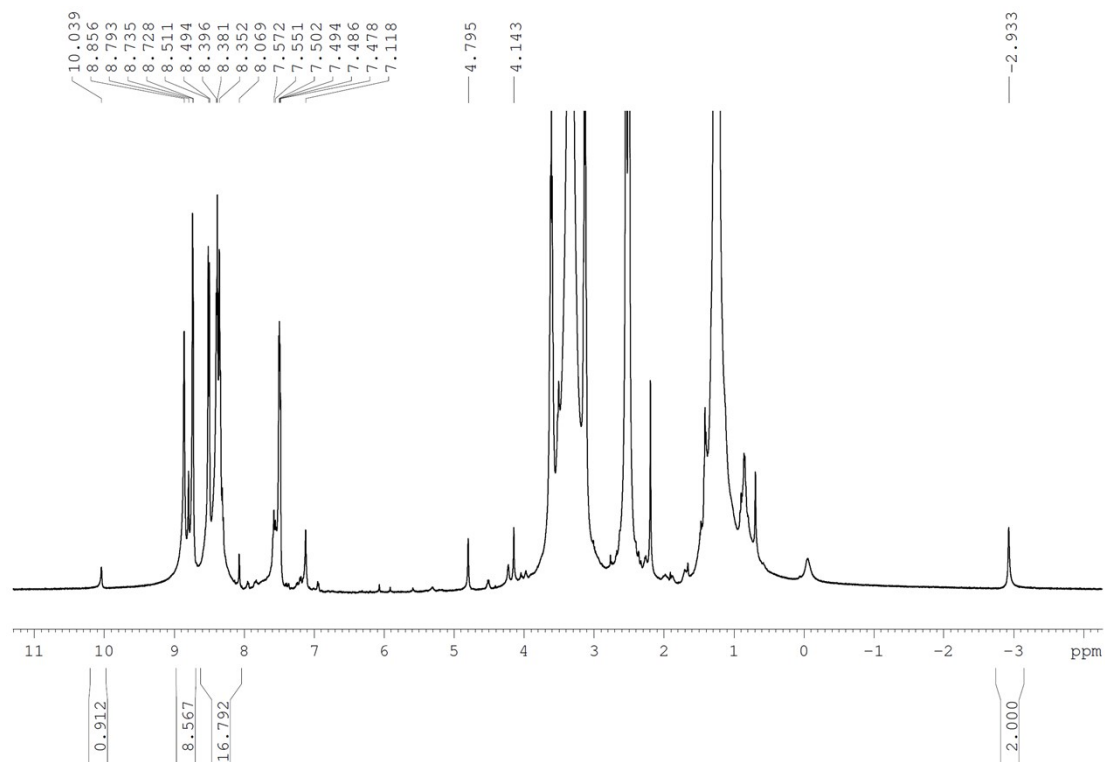

**Figure S4.**  $^1\text{H}$  NMR spectrum of compound **TCPP-NCDots** in  $\text{d}_6\text{-DMSO}$ .

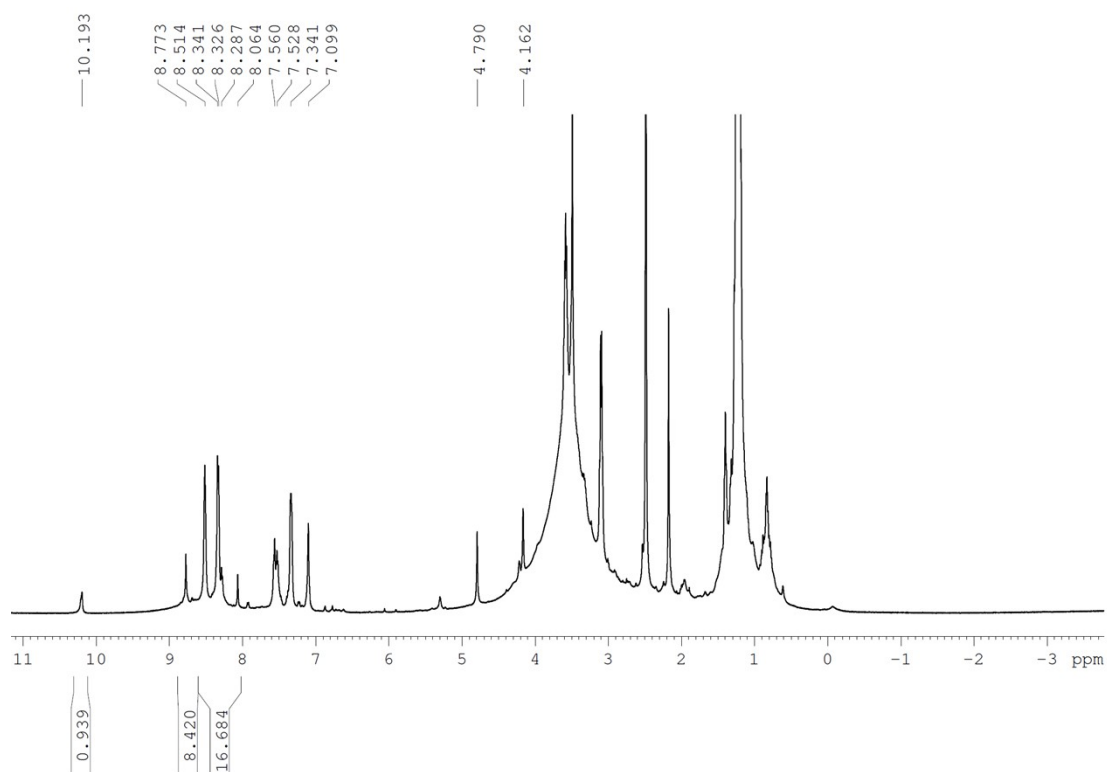

**Figure S5.**  $^1\text{H}$  NMR spectrum of compound ZnTCPP-NCDots in  $d_6$ -DMSO.

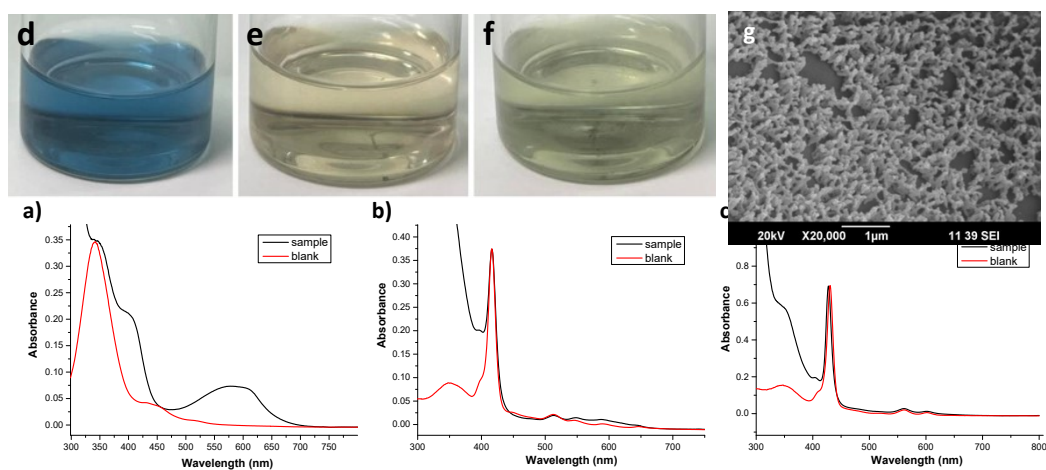

**Figure S6.** UV-Vis spectra of the sample with ninhydrin and the corresponding blank of Kaiser experiments for a) NCDots, b) TCPP-NCDots and c) ZnTCPP-NCDots. Photos of the samples of d) NCDots, e) TCPP-NCDots and f) ZnTCPP-NCDots. g) SEM image of NCDots.

**Table S1:** Table of concentration ( $\mu\text{mol/g}$ ) and percentage of free primary amino groups of **NCDots**, **TCPP-NCDots** and **ZnTCPP-NCDots**.

| Compound         | $\mu\text{mol/gr}$ | % Free $-\text{NH}_2$ |
|------------------|--------------------|-----------------------|
| 1. NCDots        | 121                | 100%                  |
| 2. TCPP-NCDots   | 12                 | 9.9%                  |
| 3. ZnTCPP-NCDots | 13                 | 10.7%                 |

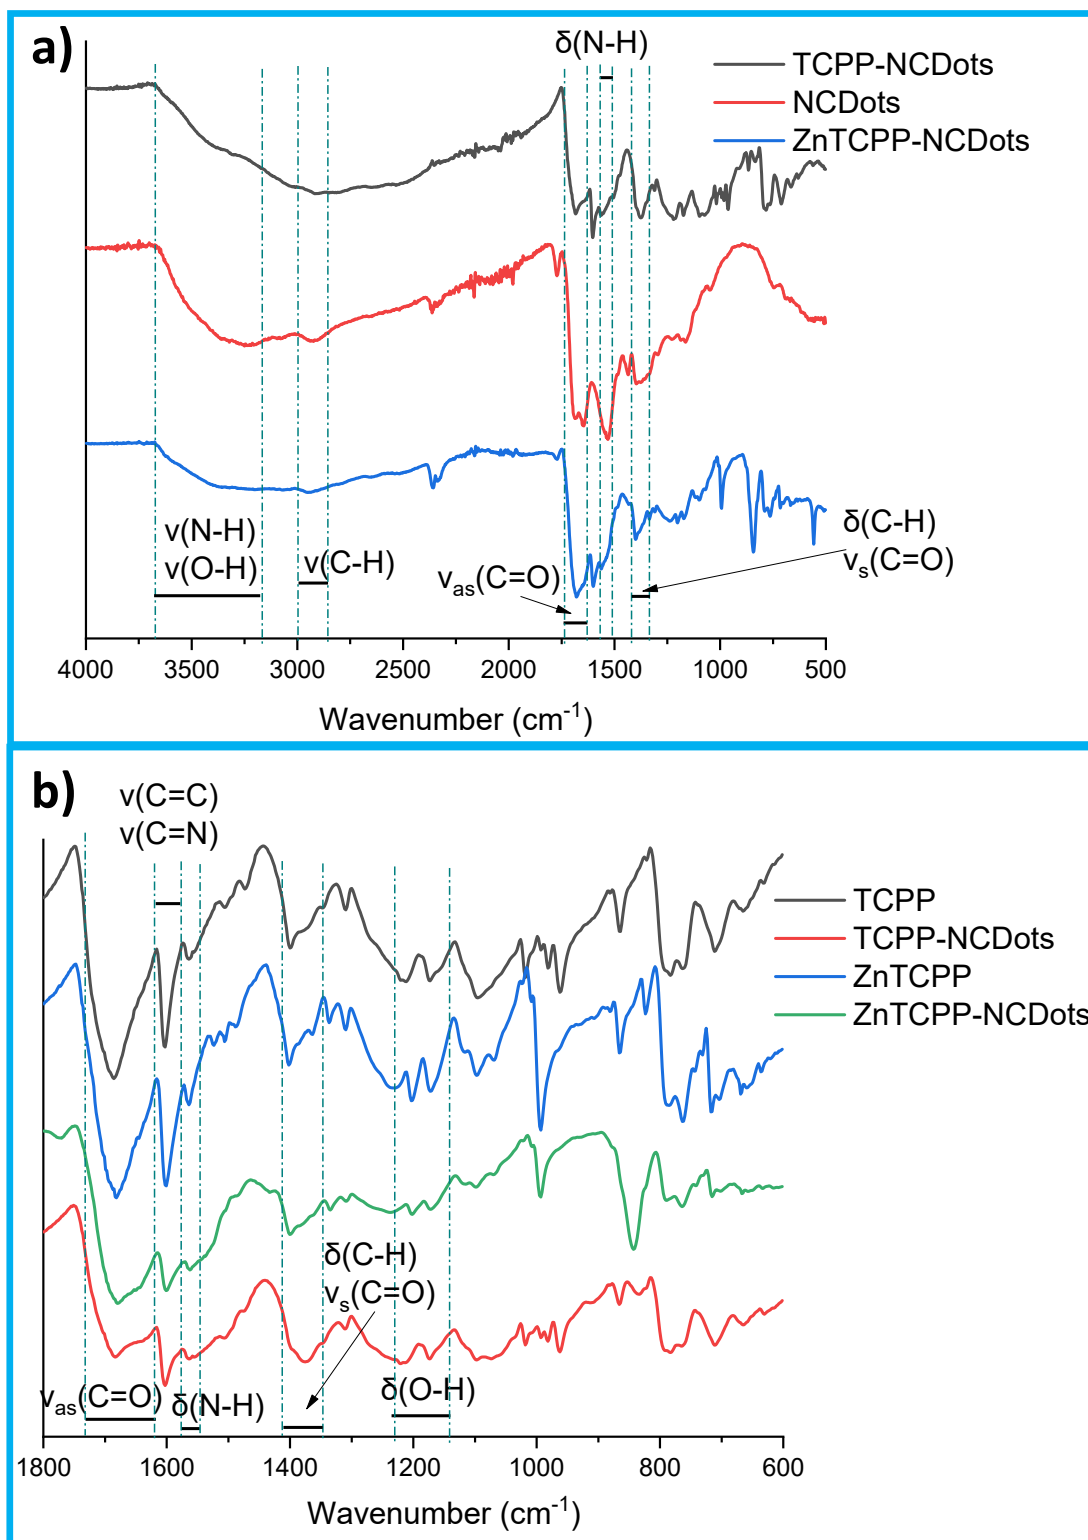

**Figure S7.** FT-IR spectra of TCPP-NCDots, ZnTCPP-NCDots, NCDots and the starting TCPP and ZnTCPP porphyrins.

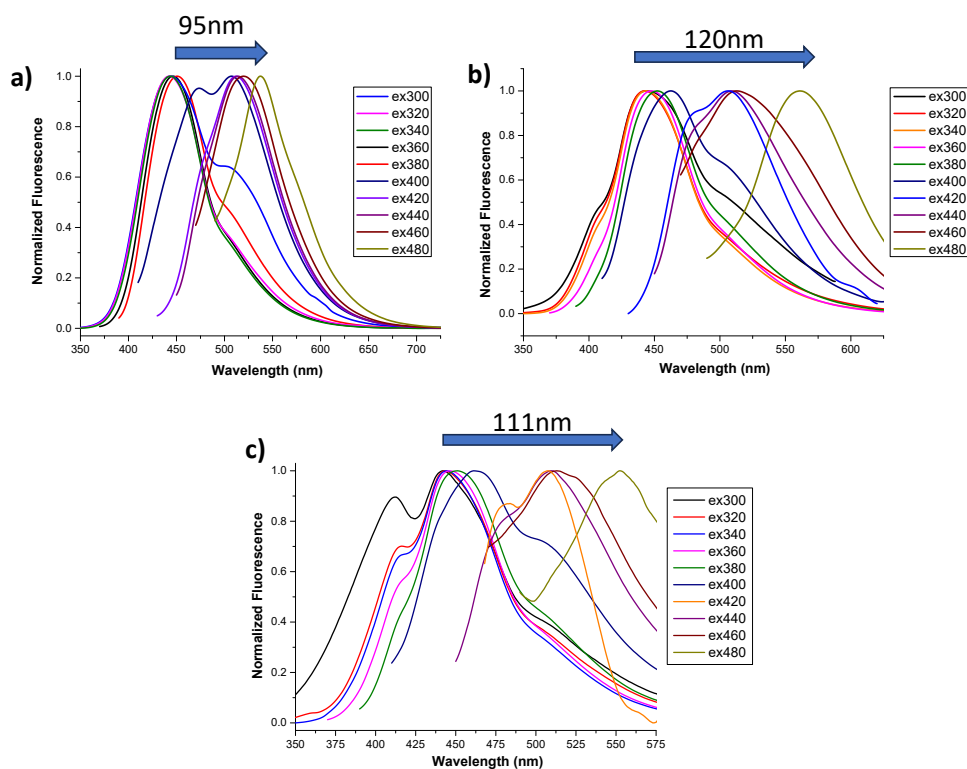

**Figure S8:** Normalized emission spectra in DMSO of the NCDot-originated emission band for nanomaterials a) **NCDots**, b) **TCPP-NCDots** and c) **ZnTCPP-NCDots**.

**Table S2.** Atomic fractions of carbon containing species.

| Sample        | at%  |         |      |      |                 |                   |
|---------------|------|---------|------|------|-----------------|-------------------|
|               | C-C  | C-N/C-O | -C=O | -COO | $\pi$ - $\pi^*$ | C bonded with O/N |
| TCPP          | 74.0 | 11.7    | 5.3  | 6.0  | 3.0             | 23.0              |
| ZnTCPP        | 75.9 | 10.4    | 4.3  | 6.6  | 2.8             | 21.2              |
| NCDots        | 51.2 | 31.2    | 16.0 | 1.6  |                 | 48.8              |
| TCPP-NCDots   | 68.4 | 21.2    | 10.5 | 0    | 0               | 31.6              |
| ZnTCPP-NCDots | 66.0 | 22.6    | 10.0 | 1.4  | 0               | 34.0              |

**Table S3.** Binding Energies of N1s and Zn2p<sub>3/2</sub> peaks.

|               | N1s (eV)      | Zn2p <sub>3/2</sub> (eV) |
|---------------|---------------|--------------------------|
| TCPP          | 398.2 & 400.1 |                          |
| ZnTCPP        | 398.6         | 1022.2                   |
| NCDots        | 400.1         |                          |
| TCPP-NCDots   | 400.0         |                          |
| ZnTCPP-NCDots | 400.1         | 1021.1                   |

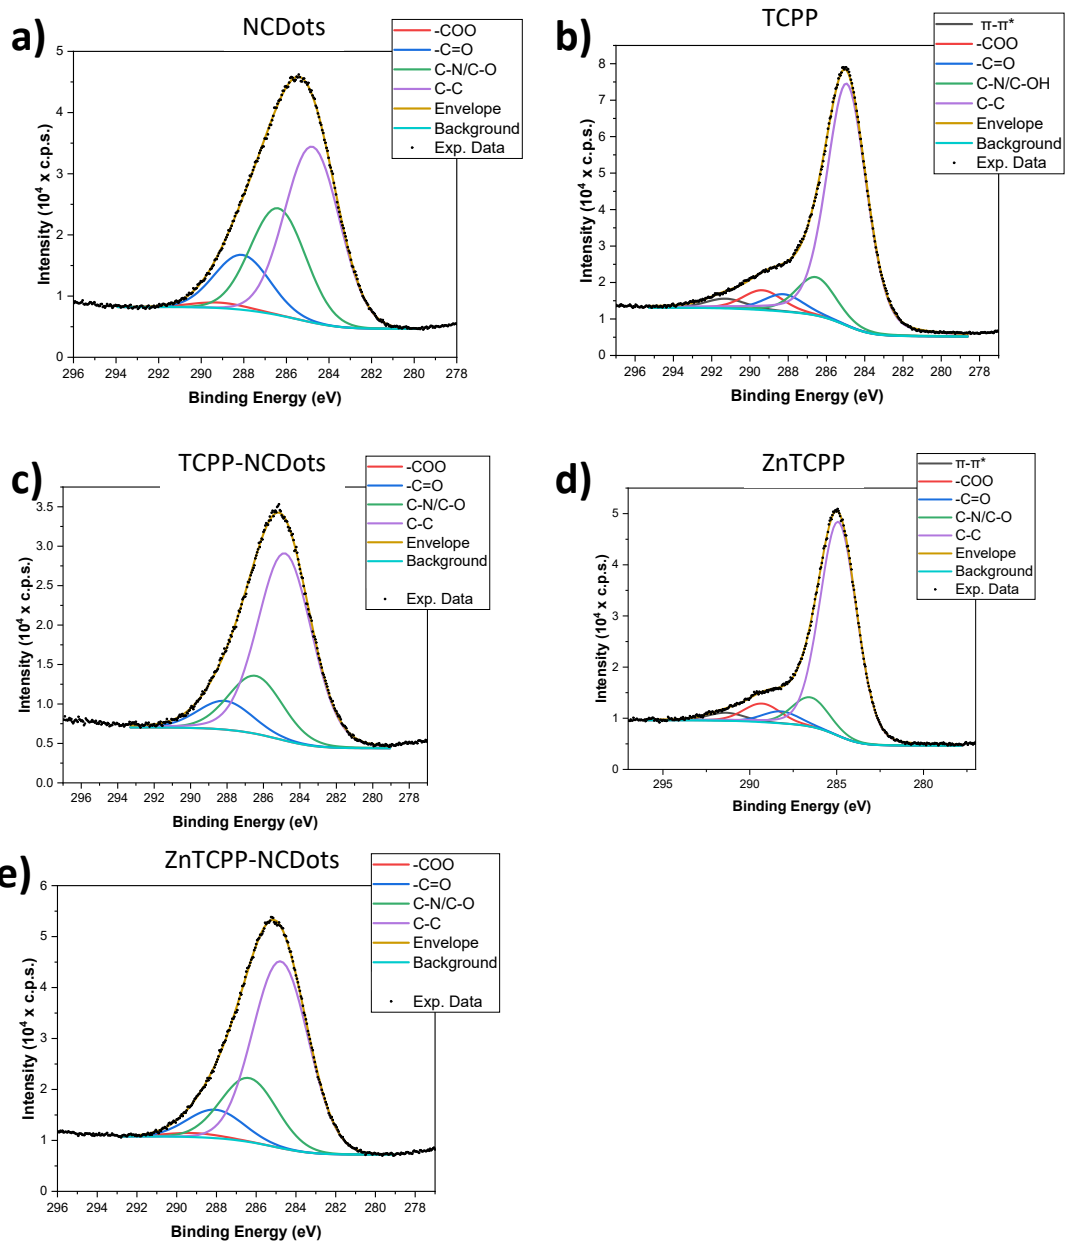

**Figure S9.** C1s spectra of the a) NCDots, b) TCPP, c) TCPP-NCDots, d) ZnTCPP and e) ZnTCPP-NCDots.



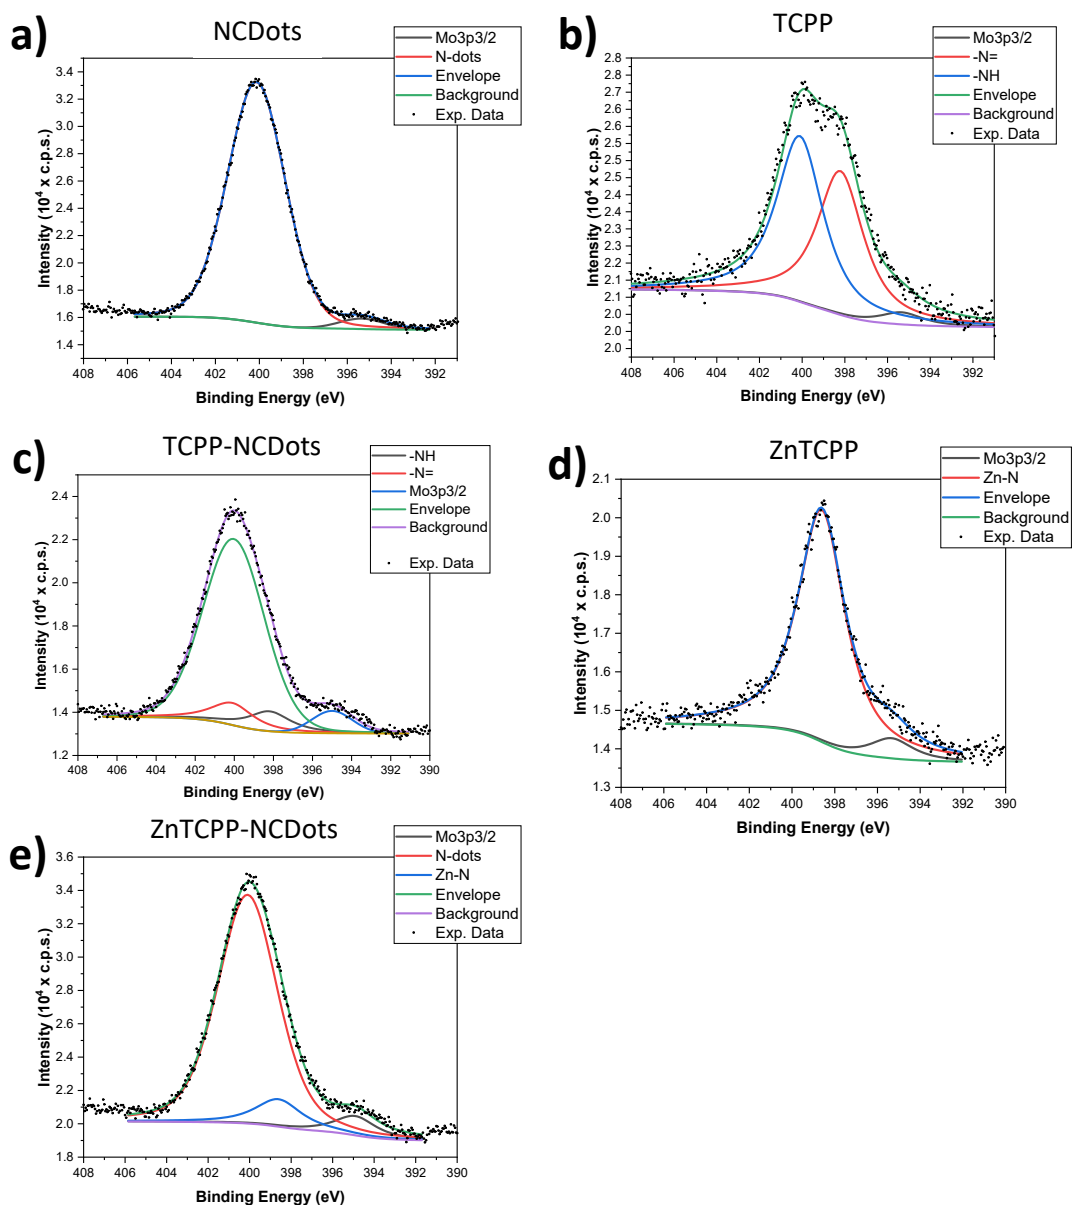

**Figure S10.** N1s spectra of the a) NCDots, b) TCPP, c) TCPP-NCDots, d) ZnTCPP and e) ZnTCPP-NCDots.

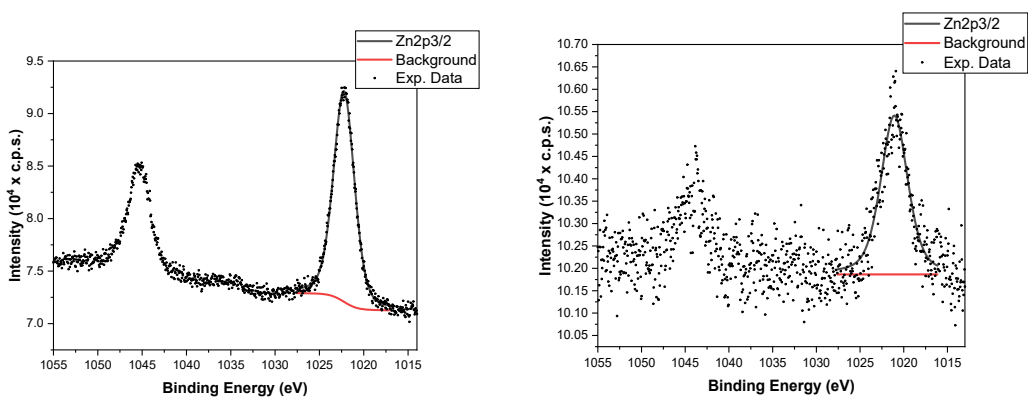

**Figure S11.** XPS peaks of ZnTCPP (left) and ZnTCPP-NCDots (right).

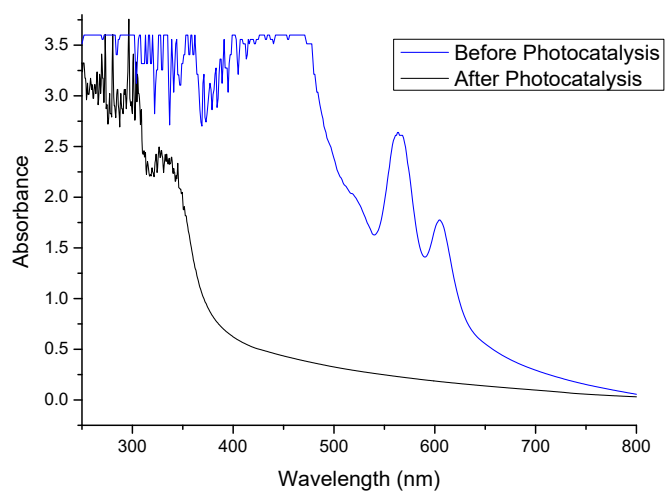

**Figure S12.** UV-Vis absorption spectra of the catalytic media using **ZnTCPP-NCDots** photocatalyst before and after the catalysis.

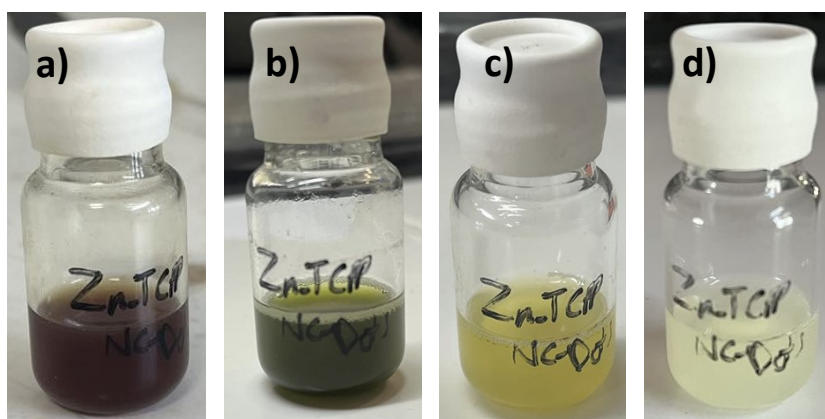

**Figure S13.** Photos of the catalytic media using **ZnTCPP-NCDots** photocatalyst after a) 0h, b) 24h, c) 48h and d) 72h of light irradiation.

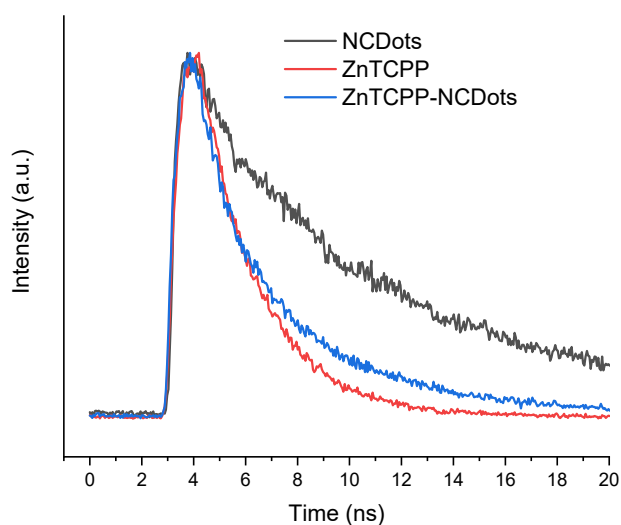

**Figure S14.** Histogram of lifetime fluorescence decay of **ZnTCPP**, **NCDots** and **ZnTCPP-NCDots** with a 406 nm excitation.

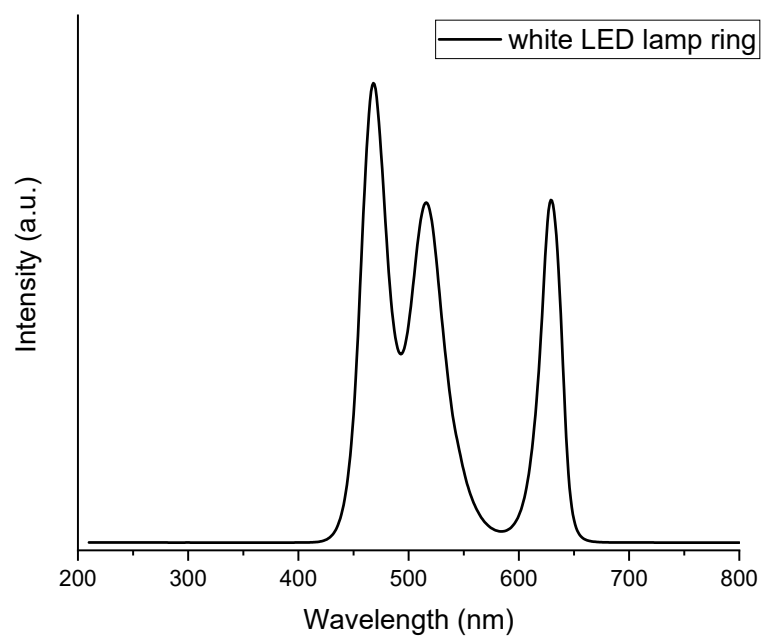

**Figure S15.** Spectral profile of the white LED lamp ring of 40 W with colour temperature 6400 K and lumen of 3800 LM used for the photocatalytic experiments.

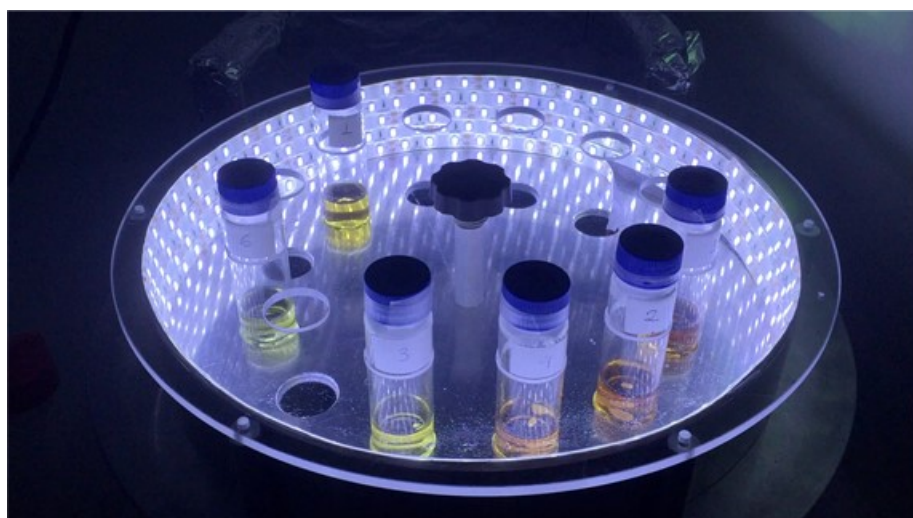

**Figure S16.** Photo of the photoreactor used for the photocatalytic experiments.
